# Supplementary material
Source: ML conference proceedings conference paper supplement (https://aclanthology.org/D11-1116)
Supplement: Attachment [file featureTemplates.pdf › featureTemplates.pdf]

-2,-1,-0,+0,+1,+2 — word position identifiers (the features are used to determine the relation between the words at -0 and +0)

$\alpha_x, \beta_x, \rho_x, \xi_x, \epsilon_x$  — x's lowercase text, word cluster, part-of-speech, rightmost child, and leftmost child, respectively.

$\varrho_x$  — if  $\rho_x$  ends with \$:  $\rho_x$  else: first two letters of  $\rho_x$

$\kappa_x, \omega_x$  — x's original index in the sentence, first three characters (lowercase), respectively

$\tau_x$  — if  $\rho \in \{\text{IN, WRB, WP}\}$ :  $\alpha_x + \rho_x$  else  $\rho_x$

$\delta_x$  — dependency links from x; left/right direction is included; *prep*, and *punct* links include word form; *nsubj* includes form if it is 'it'; *advmod* links include word cluster; additional indicator if x has a relative pronoun *nsubj*, *nsubj*→*prep*→*pobj*, *dobj*, *iobj*, or *prep*→*pobj* or as a *poss* of these positions.

$\gamma_x$  — target of dependency arc x

$\lambda_x$  —  $\kappa_{\xi_x} - \kappa_{\epsilon_x}$

$\eta_{x,y}$  — token y places to the right of token x in original token order

$\sigma_x, \Delta_x$  — determiner (or possessor) of x, indicator if x is either possessive or a definite determiner

for  $\mathbf{x} \in \{-2, -1, -0, +0, +1, +2\}$

$\tau_x, \varrho_x, \alpha_x, \beta_x, \xi_x \neq \text{null} \ \& \ \epsilon_x \neq \text{null}, \tau_x \wedge \lambda_x, \rho_x \in \{\text{VBD, VBN}\}, \rho_x \in \{\text{NNS, VBZ}\}, \rho_x \in \{\text{NN, VB}\}, \alpha_x \in \{\text{the, a, an}\}$

for  $\mathbf{x}$  where  $\text{MAX}(\kappa_{-0}\kappa_{+0} - 10) < \kappa_x < \kappa_{+0}$ :  $\tau_x$

for  $\mathbf{x}$  where  $\text{MAX}(\kappa_{-0}, \kappa_{+0} - 10) < \kappa_x < \kappa_{+0} \ \& \ \alpha_x \in \{“; : - ( )\}$ :  $\alpha_x$

for  $\mathbf{x} \in \{-1, -0, +0, +1\}$ : if  $\rho_x == \text{CC}$ :  $\xi_x \neq \text{null} \ \& \ \epsilon_x \neq \text{null}, \alpha_x \wedge \rho_{\epsilon_x} \wedge \rho_{\xi_x}$

for  $\mathbf{x} \in \{-2, -1, -0, +0, +1, +2\}$ : for  $\mathbf{y} \in \delta_x$ :  $\mathbf{y}$

if  $\rho_{-1} == \text{CC}$

$\tau_{-2} \wedge \tau_{-0} \wedge \tau_{+0}, \tau_{-2} \wedge \tau_{-0} \wedge \tau_{+0} \wedge \rho_{\xi_{-2}} \wedge \rho_{\epsilon_{-2}}$

for  $\mathbf{x} \in \{-0, +0\}$ :  $(\rho_x == \rho_{-2}) \wedge \tau_{+0}, (\varrho_x == \varrho_{-2}) \wedge \tau_{+0}, (\alpha_x == \alpha_{-2}) \wedge \tau_{+0}$

if  $\rho_{-0} == \text{CC}$

$\rho_{-2} \wedge \rho_{-1} \wedge \rho_{+0}, \varrho_{-2} \wedge \varrho_{+0}$

for  $\mathbf{x} \in \{+0, +1, +2\}$ : for  $\mathbf{y} \in \{-2, -1\}$ :  $\alpha_x == \alpha_y, \rho_x == \rho_y, \varrho_x == \varrho_y$

if  $\rho_{+0} == \text{CC}$

$\rho_{\xi_{+0}} == \rho_{-0}, \varrho_{\xi_{+0}} == \varrho_{-0}, \alpha_{-0} == \alpha_{\xi_{+0}}, \alpha_{-1} == \alpha_{\xi_{+0}},$

$\sigma_{-0} == \sigma_{\xi_{+0}}, \sigma_{-2} == \sigma_{\xi_{+0}}, \sigma_{-2} == \sigma_{\xi_{+0}} \ \& \ \sigma_{-0} \neq \sigma_{\xi_{+0}}, \Delta_{\sigma_{-2}} \wedge \Delta_{\sigma_{-0}} \wedge \Delta_{\sigma_{\xi_{+0}}}$

if  $\rho_{+1} == \text{CC}$

$\alpha_{-0} == \alpha_{+2}, \alpha_{-0} == \alpha_{\xi_{+1}}, \alpha_{\xi_{+1}} == \alpha_{-1}, \rho_{\xi_{+1}} == \rho_{-0}, \varrho_{\xi_{+1}} == \varrho_{-0}, \alpha_{+0} == \alpha_{+2}, \alpha_{+0} == \alpha_{\xi_{+1}},$

$\tau_{-0} \wedge \tau_{+0} \wedge \rho_{\xi_{+1}} \wedge \tau_{+2}, \rho_{-0} \wedge \rho_{+0} \wedge \rho_{+2}$

if  $\rho_{+2} == \text{CC}$

if  $\xi_{+2} \neq \text{null}$ : for  $\mathbf{x} \in \{-0, +0, +1\}$ :  $\alpha_{\xi_{+2}} = \alpha_x, \rho_{\xi_{+2}} = \rho_x, \varrho_{\xi_{+2}} = \varrho_x$

else  $\xi_{+2} == \text{null}$

for  $\{\mathbf{x}, \mathbf{k}\} \in \{\{+0, \{-0, -1, -2\}\}, \{+1, \{+0, -0, -1\}\}, \{+2, \{+0, -0\}\}\}$

if  $(\rho_x == \text{CC})$ : for  $\mathbf{x} \in \delta_{\xi_x}$ : for  $\mathbf{y} \in \mathbf{k}$ : for  $\mathbf{z} \in \delta_y$ :  $\mathbf{x} \wedge \mathbf{z}$

for  $\{\mathbf{x}, \mathbf{y}\} \in \{\{+0, -0\}, \{+1, +0\}\}$

for  $\mathbf{z} \in \delta_x$ : if  $\mathbf{z} == \text{whadvmod}$ :  $\alpha_{\gamma_z} \wedge \alpha_y, \alpha_{\gamma_z} \wedge \tau_y, \alpha_{\gamma_z} \wedge \beta_y, \alpha_y, \tau_y, \beta_y$

for  $\{\mathbf{x}, \mathbf{y}\} \in \{\{-1, -0\}, \{-0, +0\}, \{+0, +1\}\}$

for  $\mathbf{a} \in \delta_x$ : for  $\mathbf{b} \in \delta_y$ :  $\mathbf{a} \wedge \mathbf{b}$

for  $\mathbf{x} \in \delta_{-0}$ :  $\tau_{+0} \wedge \mathbf{x}, \beta_{+0} \wedge \mathbf{x}$

for  $\mathbf{x} \in \delta_{+0}$ :  $\tau_{-0} \wedge \mathbf{x}, \beta_{-0} \wedge \mathbf{x}$

for  $\mathbf{x} \in \{-0, +0\}$ : for  $\mathbf{y} \in \delta_x$

$\tau_x \wedge \mathbf{y}, \beta_x \wedge \mathbf{y}$

for  $\mathbf{z} \in \delta_x$ : if  $\mathbf{y} \neq \mathbf{z}$ :  $\mathbf{y} \wedge \mathbf{z}$

$\tau_{-1} \wedge \tau_{+1}, \tau_{-0} \wedge \tau_{+0} \wedge \beta_{\xi_{+0}}, \tau_{-0} \wedge \tau_{+0} \wedge \beta_{\xi_{-0}}, \eta_{+0}, \eta_{+0}, -1 \wedge \eta_{+0}, -0$

for  $\{\mathbf{x}, \mathbf{y}\} \in \{\{-1, +0\}, \{-1, -0\}, \{-0, +0\}, \{+0, +1\}, \{-0, +1\}\}$

$\tau_x \wedge \tau_y, \alpha_x \wedge \alpha_y, \alpha_x \wedge \tau_y, \tau_x \wedge \alpha_y, \beta_x \wedge \beta_y, \tau_x \wedge \tau_y \wedge \rho_{\epsilon_x} \wedge \rho_{\epsilon_y}, \tau_x \wedge \tau_y \wedge \rho_{\epsilon_x} \wedge \rho_{\xi_y}, \tau_x \wedge \tau_y \wedge \rho_{\xi_x} \wedge \rho_{\epsilon_y}, \tau_x \wedge \tau_y \wedge \rho_{\xi_x} \wedge \rho_{\xi_y}$

if  $\varrho_{-2} \neq \text{VB} \ \& \ \varrho_{-1} \neq \text{VB} \ \& \ \varrho_{+1} \neq \text{VB} \ \& \ \varrho_{+2} \neq \text{VB}$ :  $\varrho_{-0} \neq \text{VB} \ \& \ \varrho_{+0} == \text{VB}, \varrho_{+0} \neq \text{VB} \ \& \ \varrho_{-0} == \text{VB}$

if  $(-1 == \text{null} \ \& \ +1 == \text{null})$ :  $\tau_2 \wedge \tau_{+0}, \beta_2 \wedge \beta_{+0}$

if  $\rho_{-0} == \text{IN}$ :  $\alpha_{-1} \wedge \alpha_{-0} \wedge \rho_{\xi_{-0}}, \tau_{-1} \wedge \alpha_{-0} \wedge \alpha_{\xi_{-0}}, \beta_{-1} \wedge \beta_{-0} \wedge \beta_{\xi_{-0}}, \tau_{-1} \wedge \beta_{-0} \wedge \beta_{\xi_{-0}}$

if  $\rho_{+0} == \text{IN}$

for  $\mathbf{x} \in \{-2, -1\}$ :  $\omega_x \wedge \alpha_{+0} \wedge \rho_{\xi_{+0}}, \tau_x \wedge \alpha_{+0} \wedge \alpha_{\xi_{+0}}$

$\omega_{-0} \wedge \alpha_{+0} \wedge \rho_{\xi_{+0}}, \tau_{-0} \wedge \alpha_{+0} \wedge \alpha_{\xi_{+0}}, \beta_{-0} \wedge \beta_{+0} \wedge \beta_{\xi_{+0}}, \tau_{-0} \wedge \beta_{+0} \wedge \beta_{\xi_{+0}}$

if  $\xi_{+0} \neq \text{null}$ :  $\omega_{-1} \wedge \varrho_{-0} \wedge \alpha_{+0}, \omega_{-1} \wedge \tau_{-0} \wedge \alpha_{+0}, \omega_{-0} \wedge \alpha_{+0} \wedge \tau_{+1}, \xi_{+0} \neq \text{null}, \omega_{-2} \wedge \alpha_{+0}, \omega_{-1} \wedge \alpha_{+0}, \omega_{-0} \wedge \alpha_{+0},$

$\tau_{-2} \wedge \alpha_{+0}, \tau_{-1} \wedge \alpha_{+0}, \tau_{-0} \wedge \alpha_{+0}$

if  $\rho_{+1} == \text{IN}$ :  $\omega_{+0} \wedge \alpha_{+1} \wedge \rho_{\xi_{+1}}, \omega_{-0} \wedge \alpha_{+1} \wedge \rho_{\xi_{+1}}, \tau_{+0} \wedge \alpha_{+1} \wedge \alpha_{\xi_{+1}}, \tau_{-0} \wedge \alpha_{+1} \wedge \alpha_{\xi_{+1}}, \beta_{-0} \wedge \beta_{+1}, \tau_{-0} \wedge \beta_{+1},$

$\beta_{-0} \wedge \beta_{+1} \wedge \beta_{\xi_{+1}}, \tau_{-0} \wedge \beta_{+1} \wedge \beta_{\xi_{+1}}$

for  $\{\mathbf{x}, \mathbf{y}\} \in \{\{-2, -1\}, \{-1, -0\}, \{-0, +0\}, \{+0, +1\}, \{+1, +2\}\}$ :  $|\kappa_x - \kappa_y| > 1, (|\kappa_x - \kappa_y| > 1) \wedge \tau_x \wedge \tau_y$

$(\tau_{-0} \in \{\text{JJ, NN, NNS, NNP, NNPS}\}) \wedge (\exists \mathbf{x} \in \delta_{-0}: \alpha_{\gamma_x} == \text{'too'} \vee \alpha_{\gamma_x} == \text{'enough'})$

for  $\mathbf{x} \in \{-1, -2\}, \{+1, +2\}$ : for  $\mathbf{y} \in \mathbf{x}$ :  $\beta_y, \varrho_y$

Figure 1: Feature templates. If the variable is in bold, then the value of the variable is considered to be part of the identifier for any features produced by the templates utilizing that variable (only variables holding word indices may appear in bold).
